# Supplementary material for: Organization and Evolution of Subtelomeric Satellite Repeats in the Potato Genome
Source: PubMed Central journal article supplement (PMC3276127; doi:10.1534/g3.111.000125), 2011-07-01
Supplement: supp_1.2.85_FigureS2.pdf [file supp_1.2.85_FigureS2.pdf]

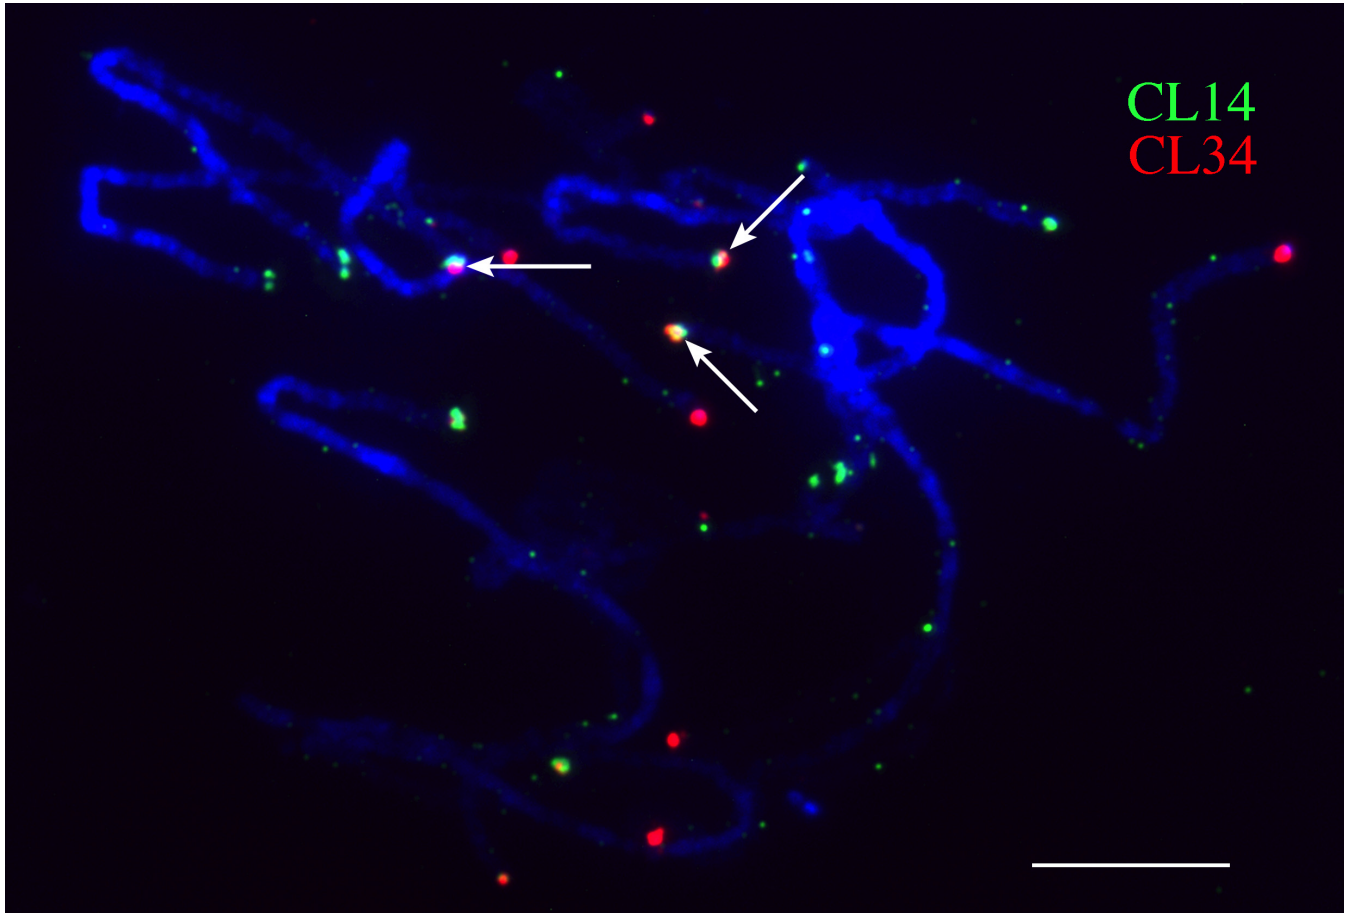

**Figure S2** FISH mapping of CL14 (green) and CL34 (red) on pachytene chromosomes of DM1-3. Arrows point to the chromosomal ends where the CL34 signals are distal to the CL14 signals. Bar = 10  $\mu$ m.
